# Supplementary material for: Integrative multi-omics networks identify PKCδ and DNA-PK as master kinases of glioblastoma subtypes and guide targeted cancer therapy
Source: PubMed Central journal article supplement (PMC9970878; doi:10.1038/s43018-022-00510-x), 2023-02-02

Figure 6d

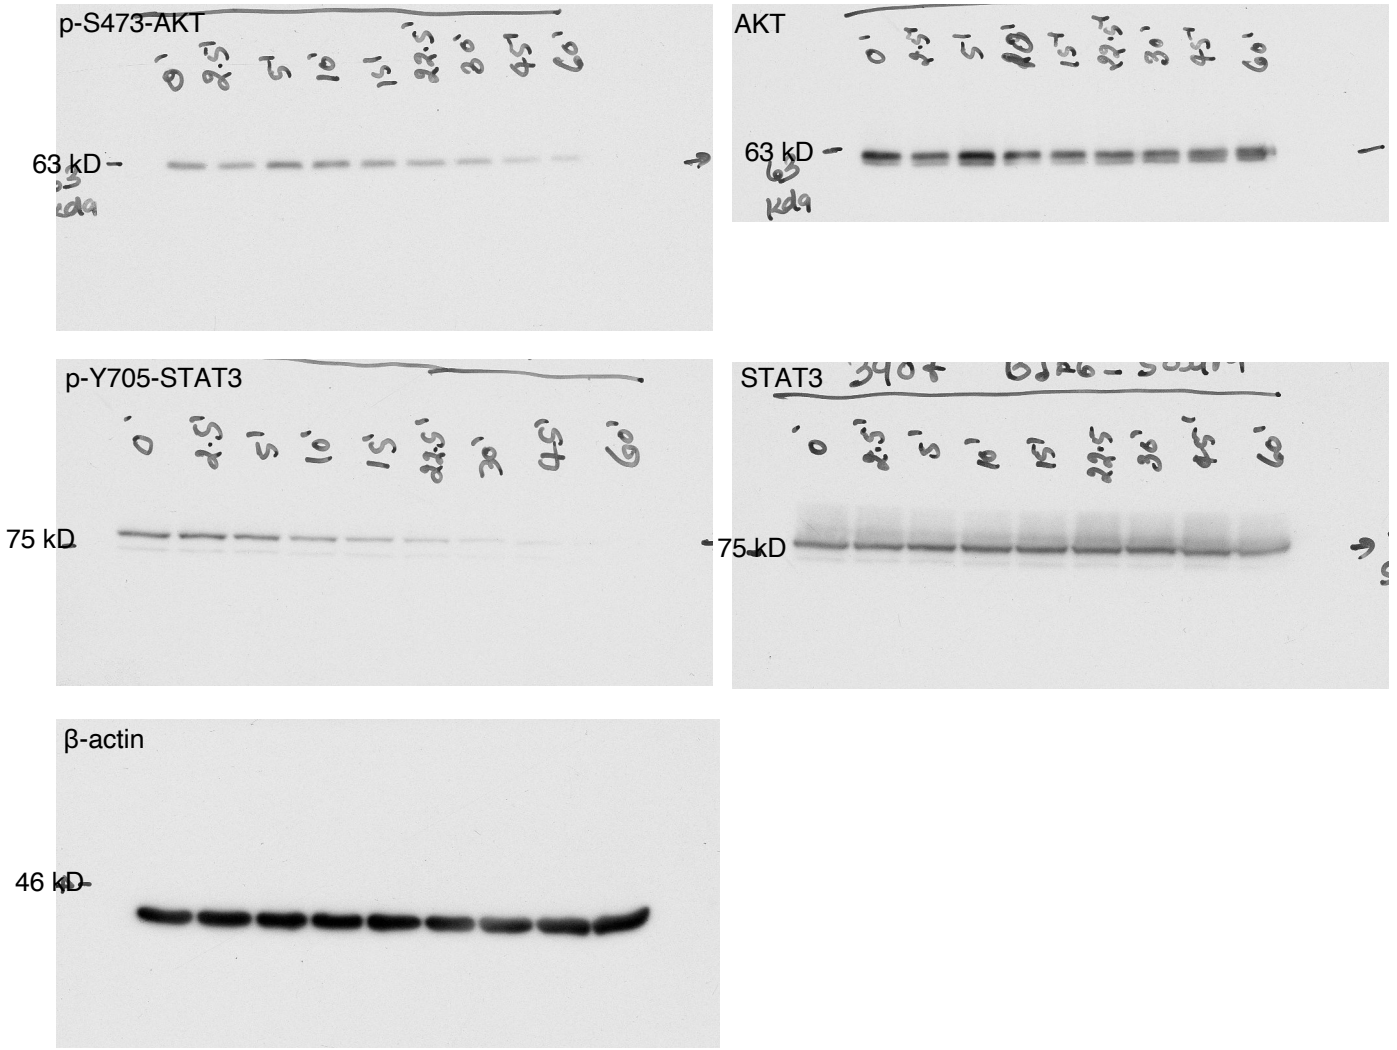

Figure 6e

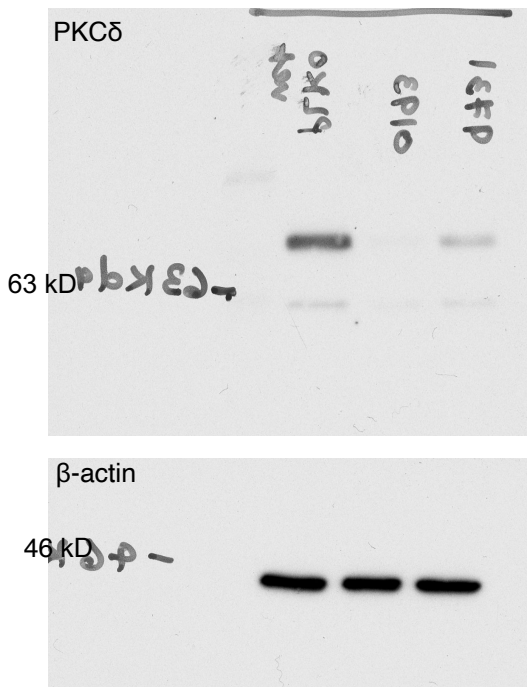

Figure 6I

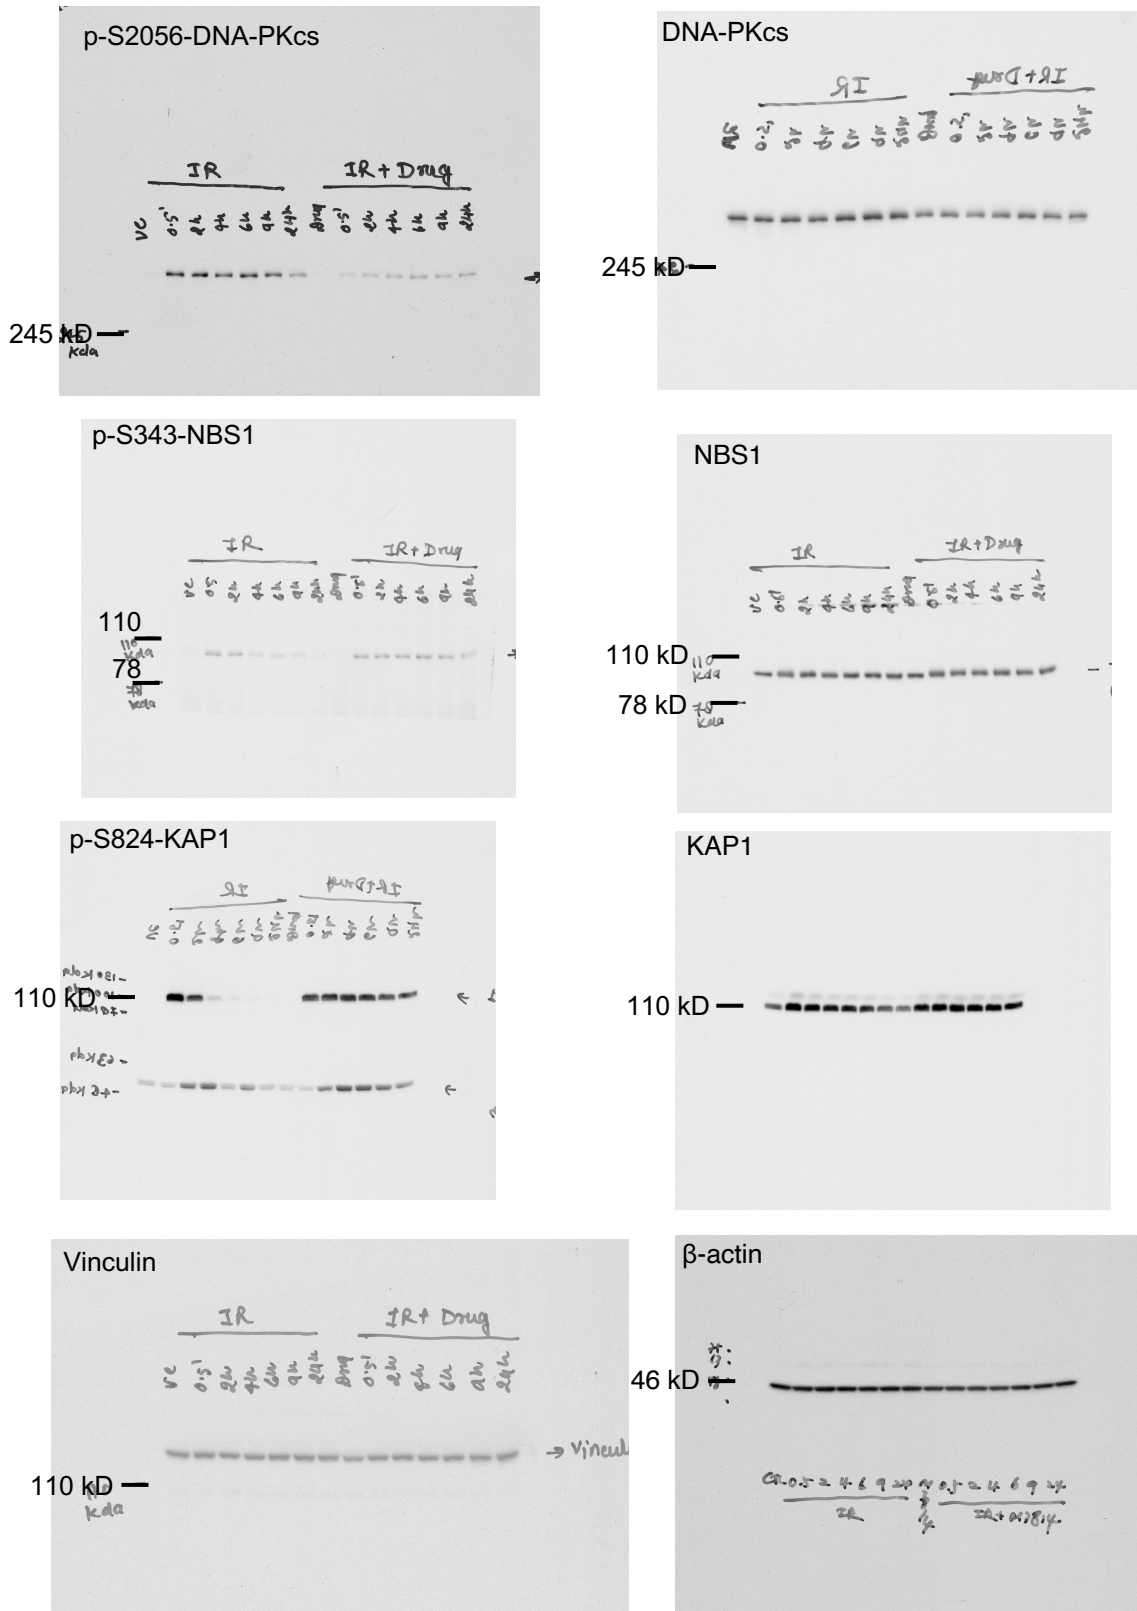

Supplement: 43018_2022_510_MOESM4_ESM.pdf [file 43018_2022_510_MOESM4_ESM.pdf]
